# Supplementary material for: Crosstalk between Lys63- and Lys11-polyubiquitin signaling at DNA damage sites is driven by Cezanne
Source: PubMed Central journal article supplement — Genes Dev. 2019 Dec 1;33(23-24):1702–17. doi: 10.1101/gad.332395.119 (PMC6942045; doi:10.1101/gad.332395.119), 2019-12-01
Supplement: supp_gad.332395.119_Supplemental_Fig.pdf [file supp_gad.332395.119_Supplemental_Fig.pdf]

## Ubiquitin-Binding Domains Array 2.0

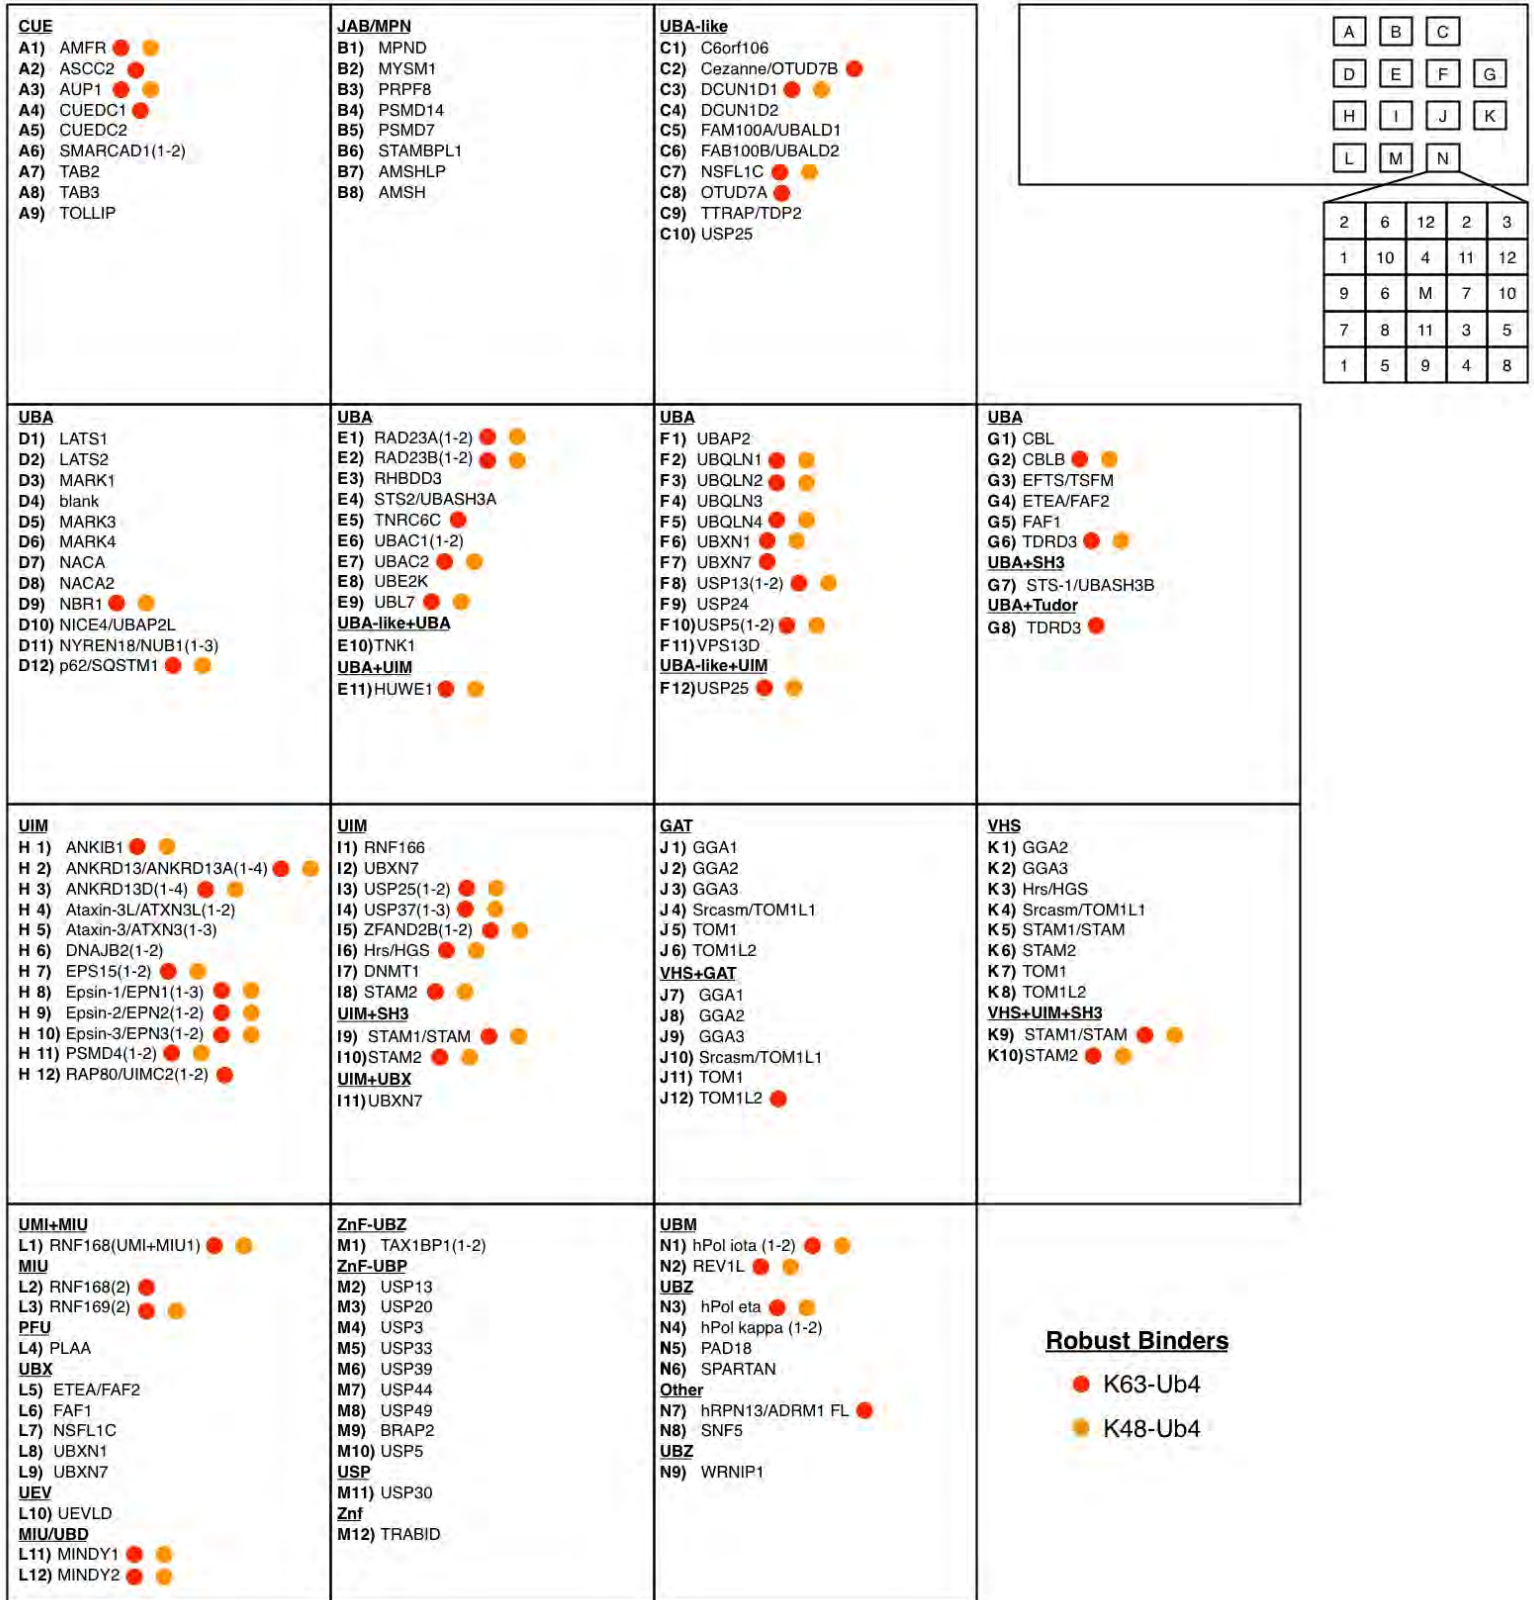

**Fig\_S1.** A list of the 148 recombinant ubiquitin-binding domains, separated into block by domain type. A key to the domain position on the array is shown in the top right. "M" represents a GST control spot. All GST-UBD fusions are arrayed in duplicate.

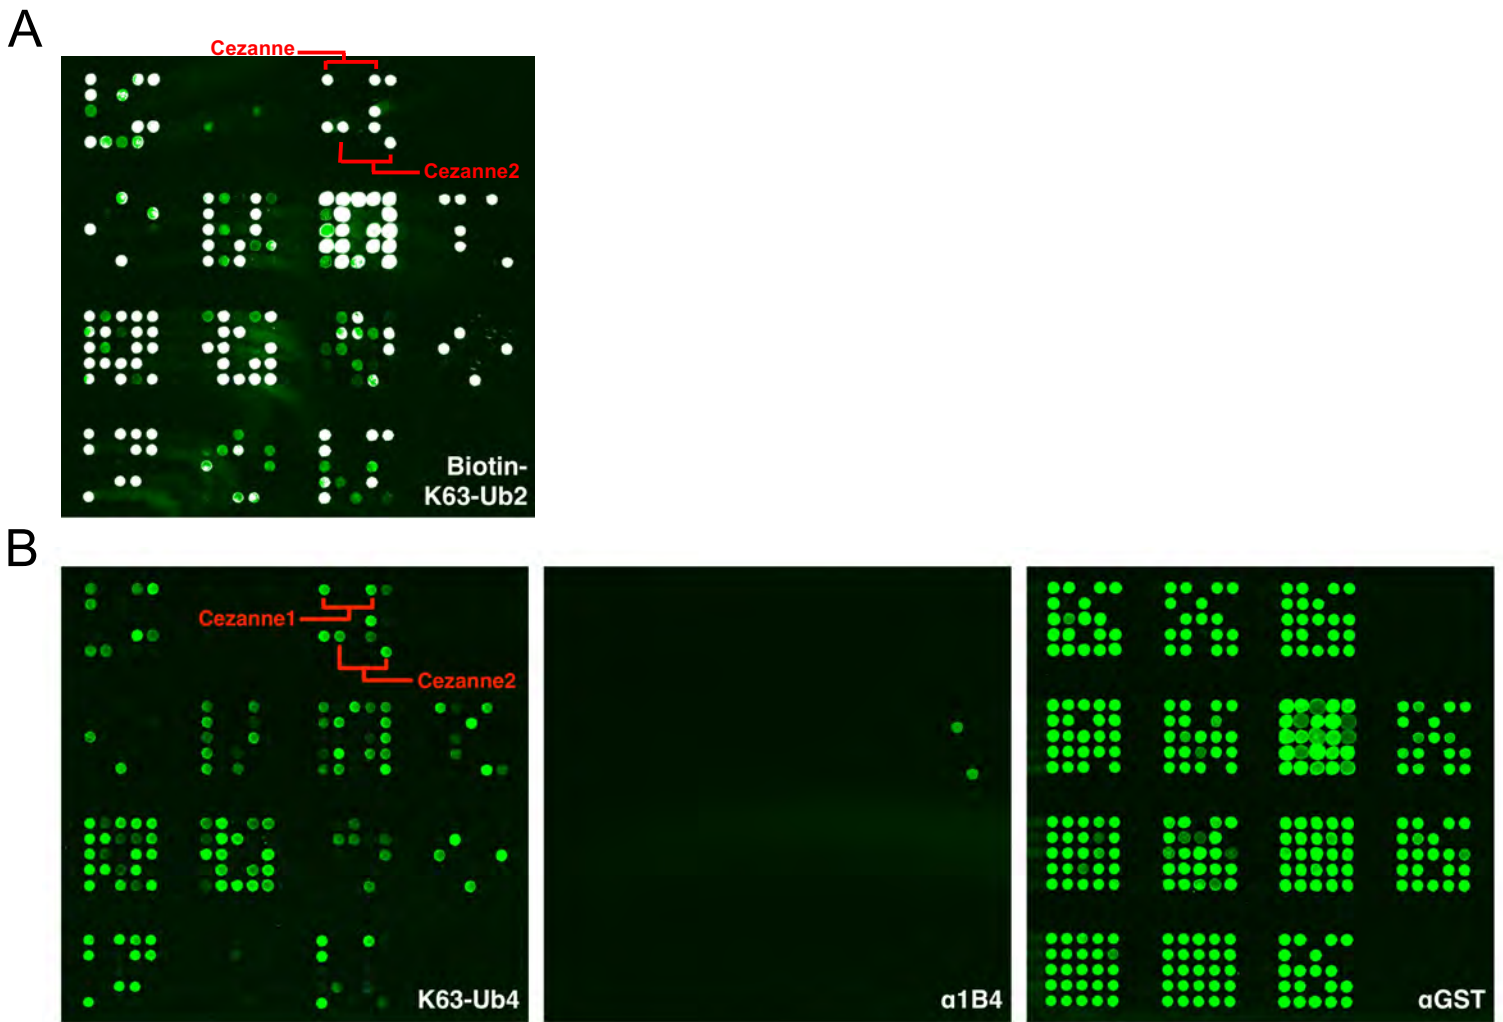

**Fig\_S2. Cezanne and Cezanne2 UBA bind to K63-linked ubiquitin.** (A) biotin-K63-diUb is used as a probe for a screen of the UBD microarray. (B) Screen using hybridization with untagged K63-tetra-Ub followed by anti-ubiquitin antibody and FITC-labeled secondary antibody. Left panel: hybridization with K63 tetra-ubiquitin chains followed by anti-ubiquitin antibody ( $\alpha$ 1B4) then FITC-labeled secondary antibody; Middle panel: hybridization with anti-ubiquitin antibody ( $\alpha$ 1B4) followed by FITC-labeled secondary antibody; Right panel; hybridization with anti-GST antibody followed by incubation with a FITC-labeled secondary antibody.

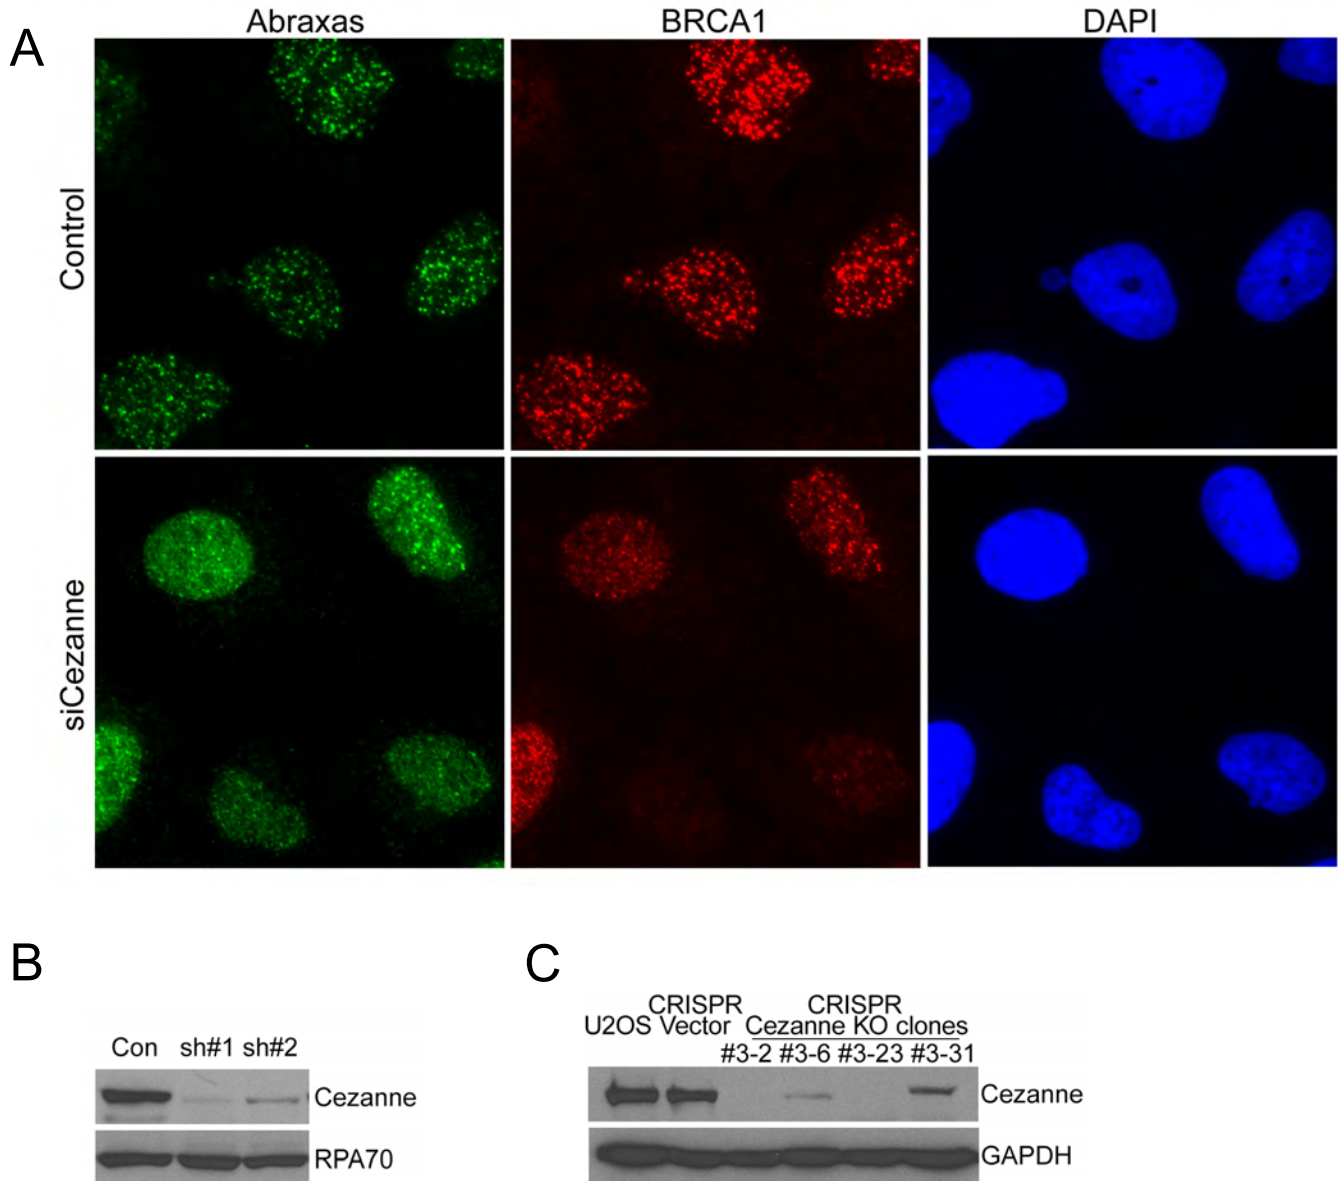

**Fig\_S3. Cezanne regulates Rap80/Abraxas/BRCA1 recruitment to DSBs.** (A) Representative images of Abraxas and BRCA1 IRIF in Cezanne siRNA treated cells treated with 10 Gy IR followed by 2 h incubation before fixation and staining. (B) Depletion of Cezanne by shRNAs (C) Generation of Cezanne knockout (KO) cells using CRISPR-Cas9. Individual clones were screened by western blot using anti-Cezanne antibody. Clone #3-2 and #3-23 were picked and named as KO#1 and KO#2.

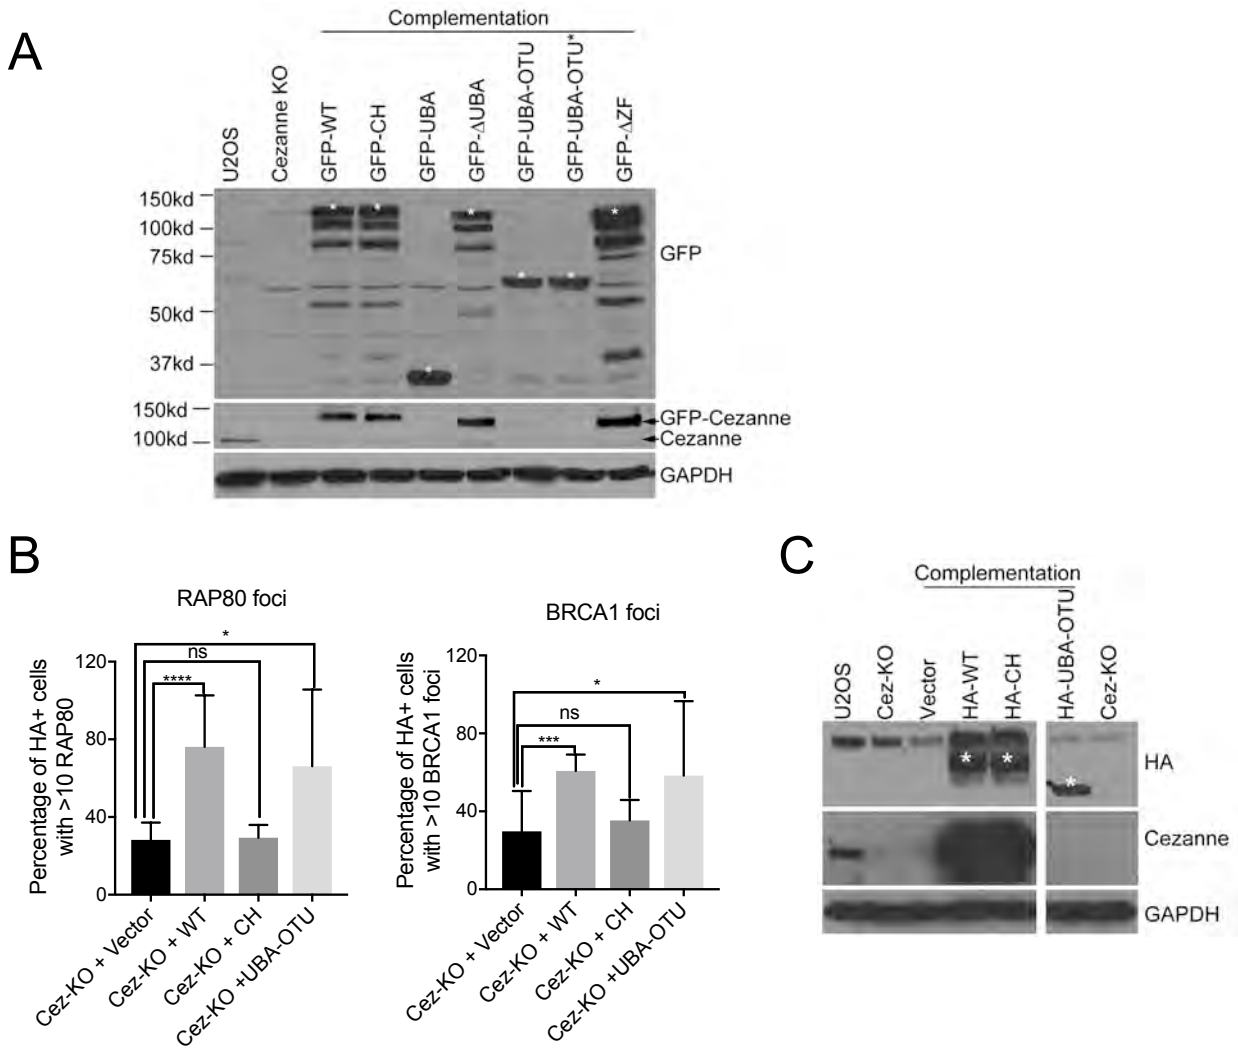

**Fig\_S4. Cezanne UBA domain and DUB activity are required for IRIF of Rap80/Abraxas/BRCA1.** (A) Western blot showing complementation of Cezanne KO cells with expression of GFP-tagged Cezanne WT and mutants. \* indicates bands with correct size. (B) Quantification of Cezanne KO cells complemented with expression of HA-tagged Cezanne WT, CH or UBA-OUT mutant. Non-parametric Kruskal-Wallis ANOVA was used for statistical analysis. (C) Western blot showing the expression of the indicated HA-tagged proteins in Cezanne KO cells using indicated antibodies.

A

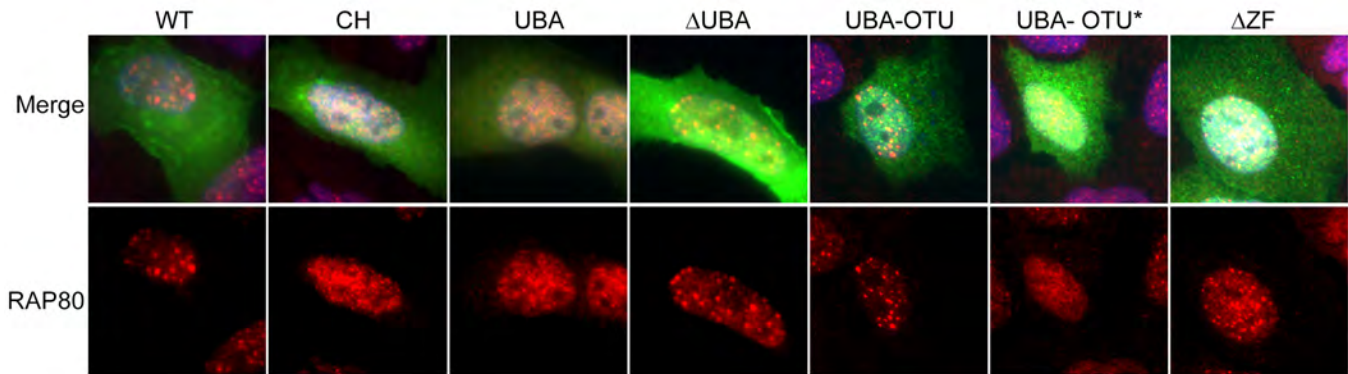

B

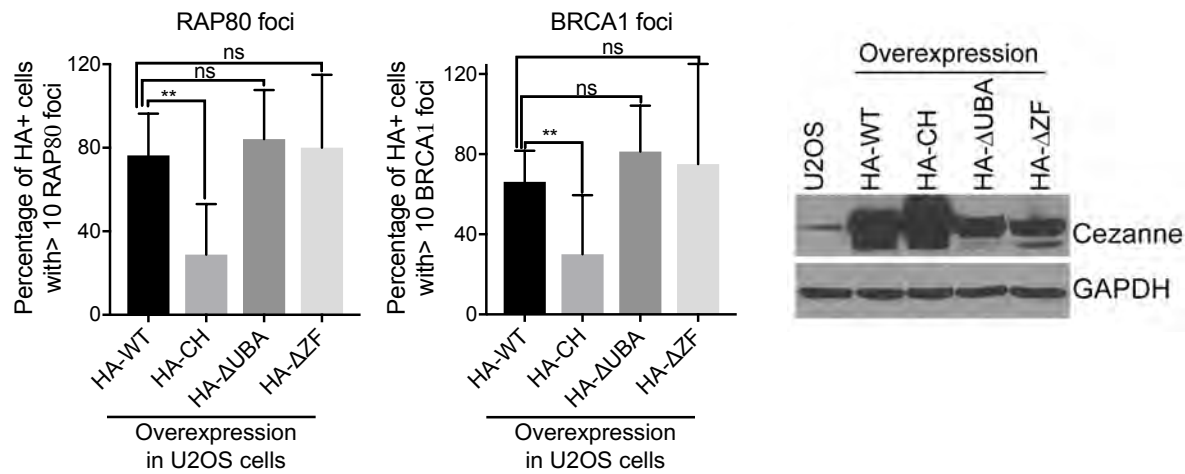

**Fig\_S5. Overexpression of Cezanne mutants lacking DUB activity plays a dominant negative effect on Rap80 recruitment.** (A) Representative images of cells overexpressing GFP-tagged Cezanne WT and mutants. Cells treated with 10 Gy IR followed by incubation at 37°C for 2h were fixed and stained with antibodies to GFP and Rap80 followed by appropriate secondary antibodies and DAPI staining. (B) Overexpression of HA-tagged Cezanne DUB mutant (CH), but not  $\Delta$ UBA or  $\Delta$ ZF, showed dominant negative effect on IRIF of Rap80 and BRCA1. Non-parametric Kruskal-Wallis ANOVA was used for statistical analysis. Protein levels of overexpression were shown in western blot with antibodies to Cezanne and GAPDH (right panel).

# Wu\_Supplemental\_FigS6

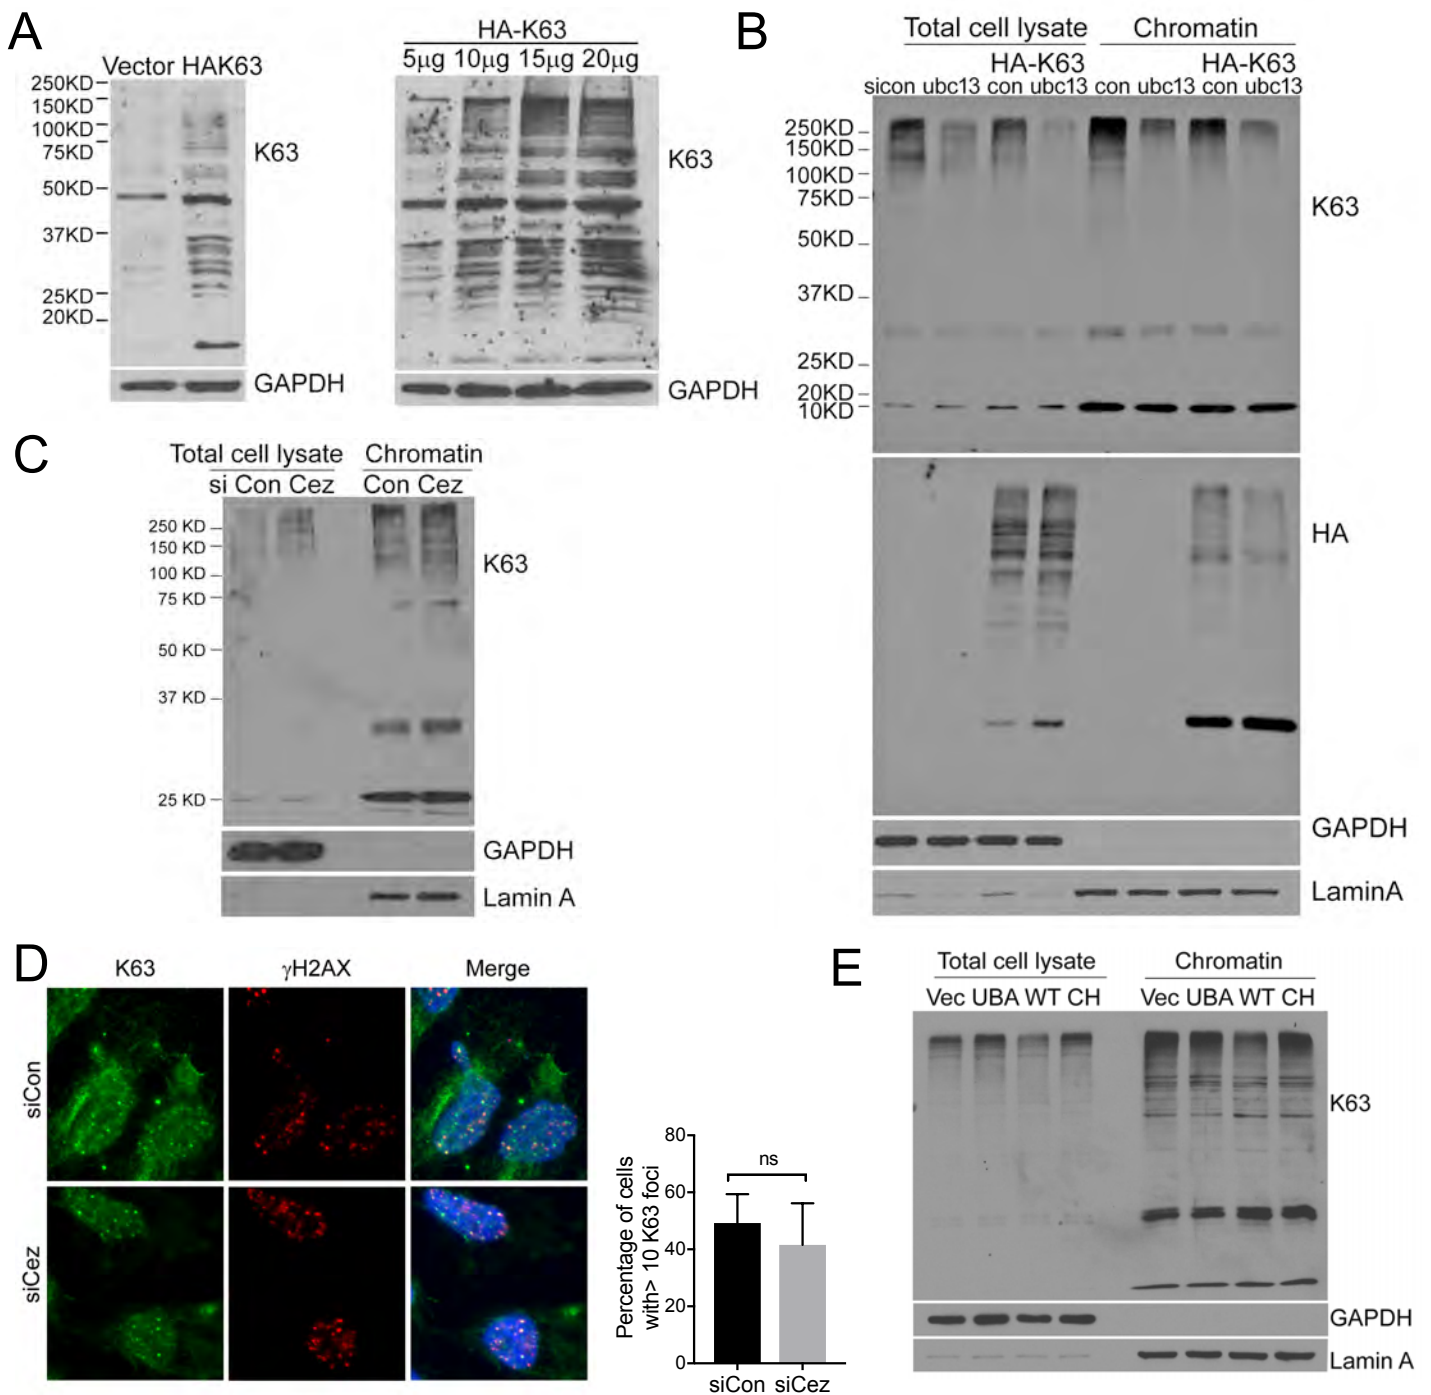

**Fig\_S6. Cezanne deficiency does not lead to decreased K63 conjugation on damaged chromatin. (A)** K63-antibody specificity. Cells were transfected with either vector or HA-tagged ubiquitin K63 mutant which all of the lysine residue except lysine 63 are mutated to arginine (HA-K63). Western blot was carried out with the antibody to K63. **(B)** K63-linkage ubiquitin levels are decreased in Ubc13 siRNA treated cells. Cells not or transiently expressing HA-K63 were treated with control or siRNAs to Ubc13. Both total cell lysate and chromatin fraction were analyzed by western blots with indicated antibodies. **(C)** K63-ubiquitin levels on damaged chromatin are not affected in Cezanne siRNA. Cells were treated with 10 Gy IR, collected at 2h after incubation. **(D)** IF staining with indicated antibodies of control and Cezanne siRNA treated cells treated with 10 Gy IR and incubated for 2h. Student's *t*-test was used for statistical analysis. **(E)** K63-ubiquitin levels on damaged chromatin in cells overexpressing GFP-tagged Cezanne UBA-only, WT or CH mutant. Total lysates or chromatin fraction from cells treated with 10 Gy IR followed by 2h incubation were examined in western blot with indicated antibodies.

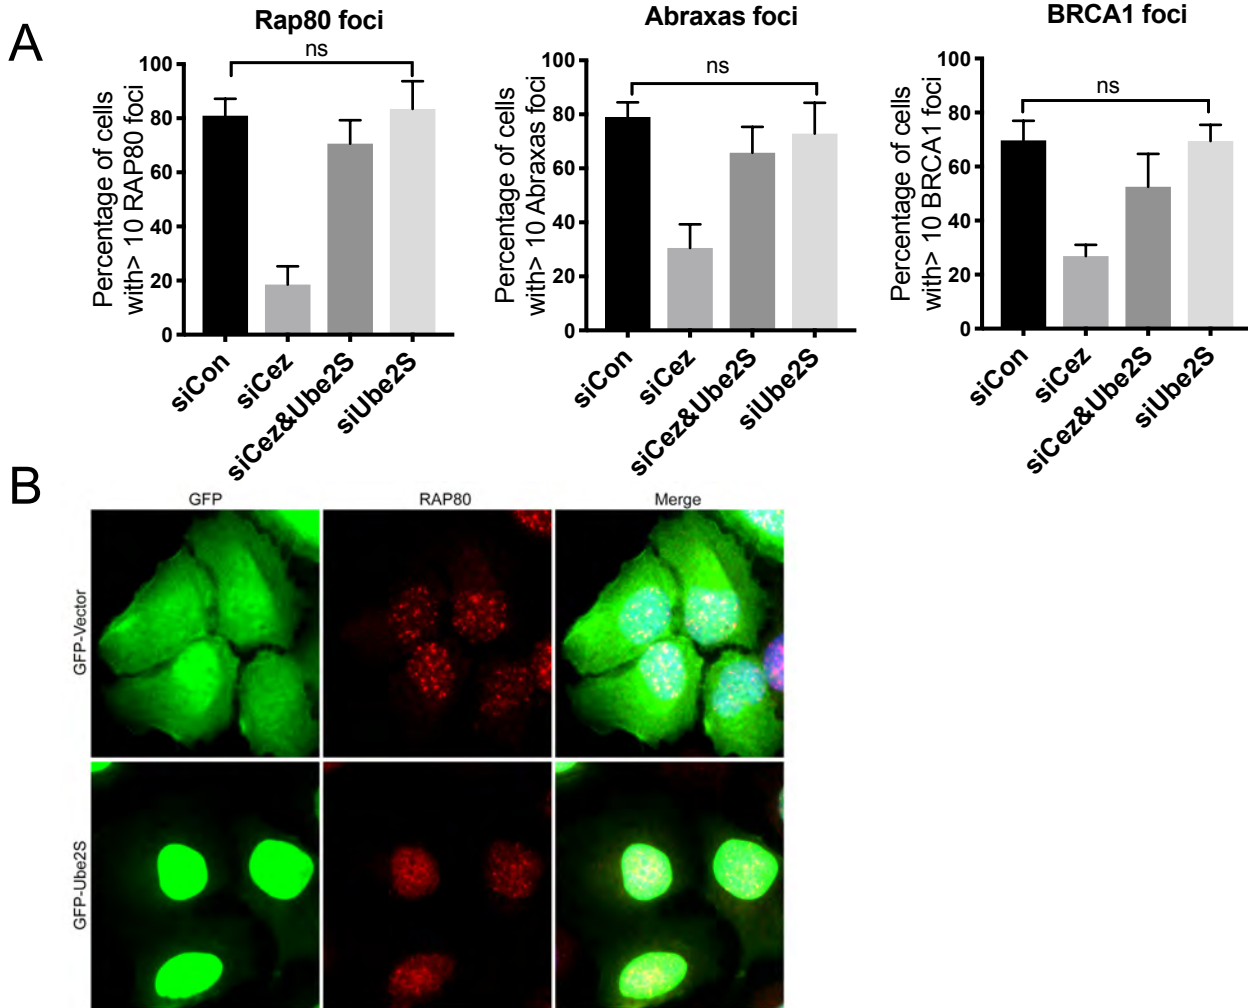

**Fig\_S7. Cezanne promotes Rap80/Abraxas/BRCA1 recruitment through its K11-linkage DUB activity. (A)** Knockdown of Ube2S alone does not have an effect on Rap80/Abraxas/BRCA1 IRIF. U2OS cells were treated with 10 Gy IR followed by 2h incubation before fixation and staining with antibodies to indicated antibodies. Non-parametric Kruskal-Wallis ANOVA was used for statistical analysis. **(B)** Representative images of IF staining of cells overexpressing Ube2S. Cells expressing GFP vector or GFP-Ube2S were treated with 10 Gy IR followed by 2 h incubation before fixation and IF staining

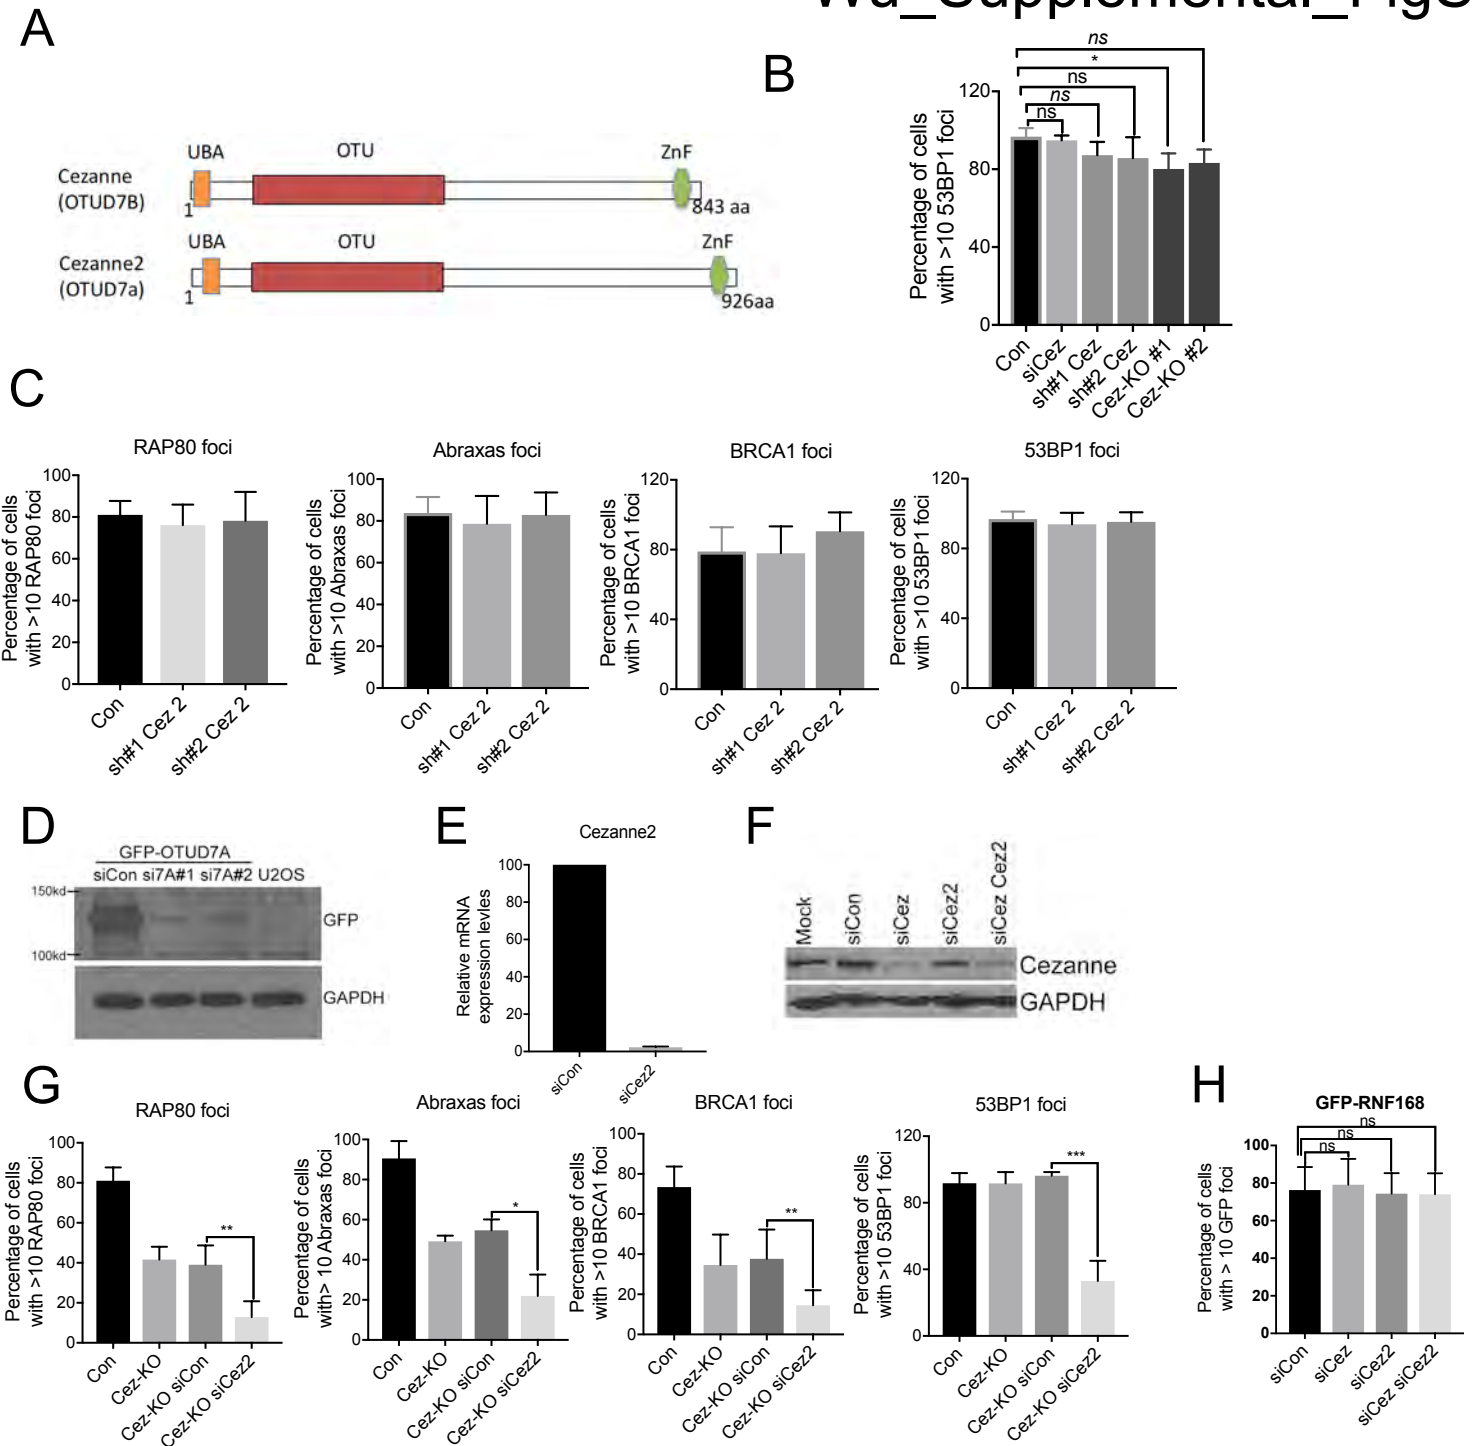

**Fig\_S8. Cezanne and Cezanne 2 promote recruitment of Rap80 and 53BP1 to DNA damage sites.** (A) A diagram of Cezanne and Cezanne2. (B) Depletion of Cezanne does not affect 53BP1 IRIF. (C) knockdown of Cezanne2 had minimal effect on Rap80, Abraxas and BRCA1 and 53BP1 IRIF. (D) Cezanne2 siRNAs depleted GFP-Cezanne2 in U2OS cells expressing GFP-Cezanne2 (OTUD7A). (E) RT-PCR of Cezanne2 gene in control and cells depleted with Cezanne2 by siRNAs. (F) Western blot of Cezanne in cells depleted of Cez, Cez2 and both. (G) Quantification of IRIF of Rap80, Abraxas and BRCA1 in Cezanne KO cells depleted of Cezanne2 by siRNAs. (H) RNF168 IRIF is not affected by depletion of Cezanne and Cezanne2. Non-parametric Kruskal-Wallis ANOVA was used for statistical analysis.



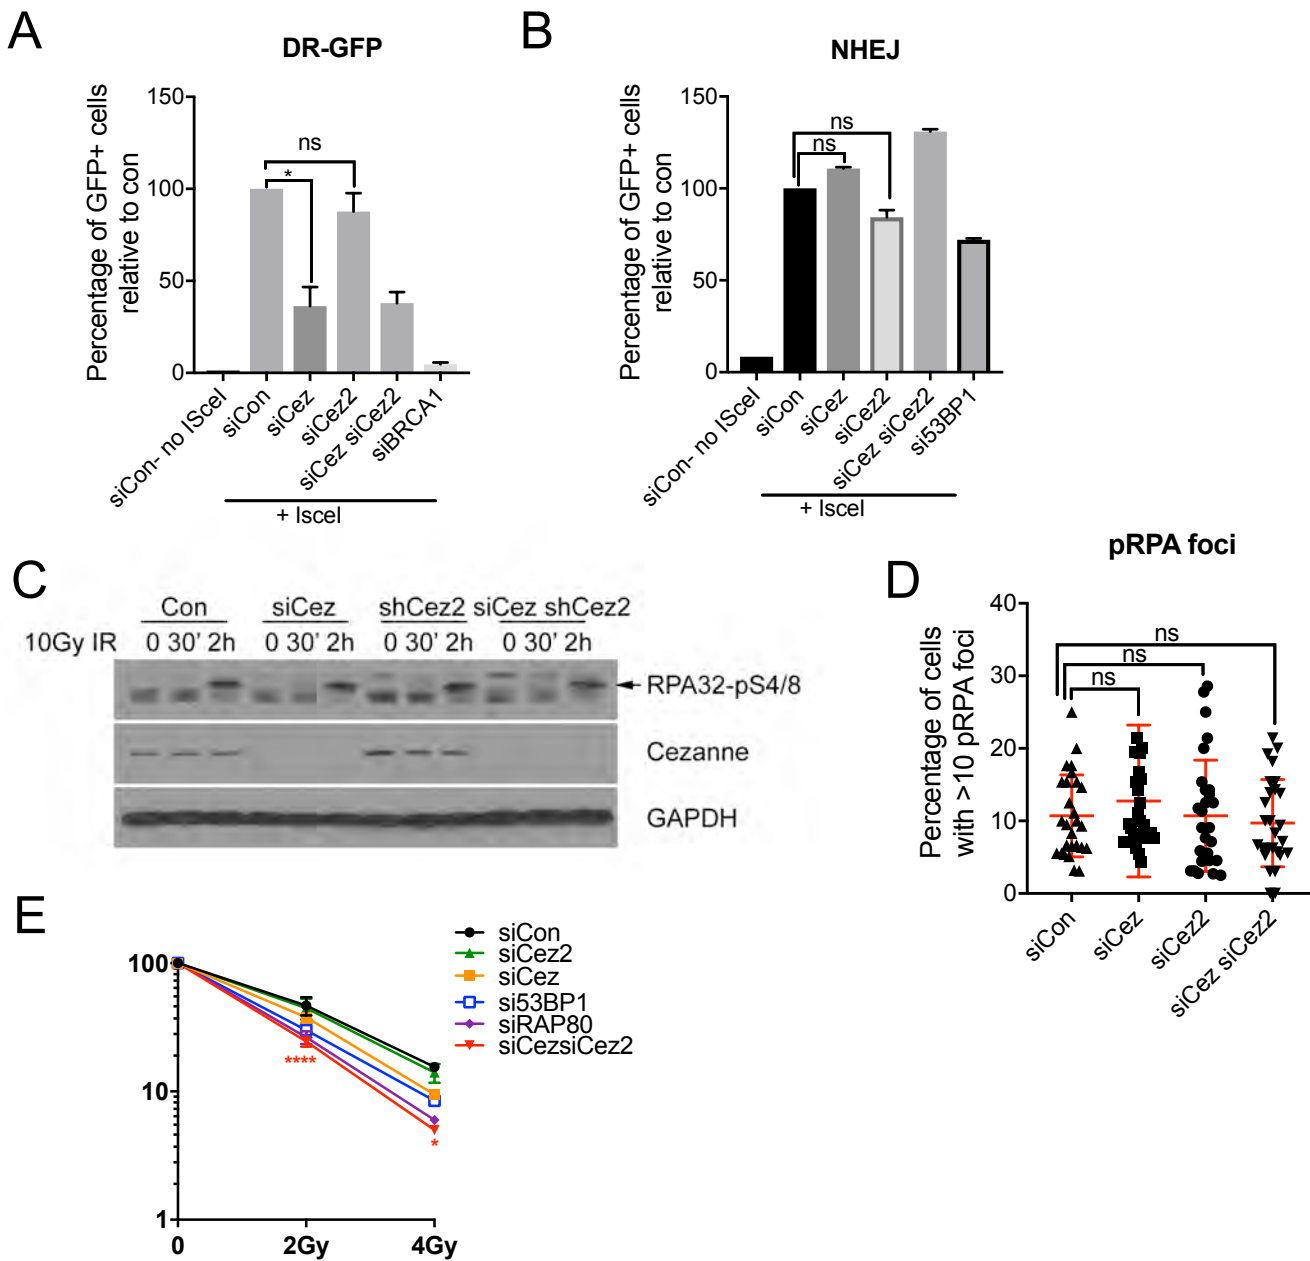

**Fig\_S9. Cezanne promotes HR repair.** (A) HR repair efficiency was examined by DR-GFP reporter assay. U2OS/DR-GFP cells were treated with indicated siRNAs. 24 h later, cells were then transiently transfected with plasmid expressing I-SceI. Percentage of GFP+ cells were quantified by flow cytometry 48 h after plasmid transfection. (B) NHEJ repair efficiency was examined by EJ-5 reporter assay. U2OS/EJ-5 cells were transfected with indicated siRNAs, then transfected with I-SceI expression plasmid. Percentage of GFP+ cells were quantified using flow cytometry 48h after plasmid transfection. Non-parametric Kruskal-Wallis ANOVA was used for statistical analysis. (C) Phosphorylated RPA32 levels in U2S cells treated with indicated siRNA and shRNAs. Cells were treated with 10 Gy IR followed by incubation at 37°C. Total cell lysate were prepared from cells collected at 30 min or 2h after IR. RPA32pS4/8 levels were detected by western blot with indicated antibodies. (D) Phosphorylated RPA32pS4/8 foci were quantified from U2OS cells treated with indicated siRNAs. Cells were treated with 10 Gy IR and fixed at 2h after IR. IF staining was carried out with pRPA32-S4/8 antibody and appropriate secondary antibodies. Non-parametric Kruskal-Wallis ANOVA was used for statistical analysis. (E) Colony formation assay of cells treated with indicated siRNAs. Two-way ANOVA statistical analysis was performed to compare the deficiency between siCez (orange) with siCezsiCez2 (red) at indicated doses.
